# Supplementary material for: Synthesis of Pt–MoS2 with enhanced photothermal and peroxidase-like properties and its antibacterial application
Source: Royal Society of Chemistry journal article supplement (doi:10.1039/d4ra05487c), 2024-01-01
Supplement: d4ra05487c1.pdf [file d4ra05487c1.pdf]

## Supporting information

# Synthesis of Pt-MoS<sub>2</sub> with Enhanced Photothermal and Peroxidase-like Properties and Its Antibacterial Application

*Liangyu Li<sup>a</sup>, Yueqin Zhang<sup>d</sup>, Yumeng Liu<sup>d</sup>, Yaojuan Wu<sup>a</sup>, Xiao Wang<sup>d</sup>, Lidong Cao<sup>b,c\*</sup>,*

*Xia Feng<sup>a,b\*</sup>*

a Nursing Department, Zhejiang Provincial People's Hospital, Affiliated People's Hospital, Hangzhou Medical College

b Department of Hepatobiliary & Pancreatic Surgery and Minimally Invasive Surgery, Zhejiang Provincial People's Hospital, Affiliated People's Hospital, Hangzhou Medical College

c College of Mechanical Engineering, Zhejiang University, Hangzhou, China

d School of Public Health, Hangzhou Medical College, Hangzhou, China

\* Correspondence: [fx19961219@163.com](mailto:fx19961219@163.com) (X.F.); [ilkwenxu2019@sina.com](mailto:ilkwenxu2019@sina.com) (L.C.)

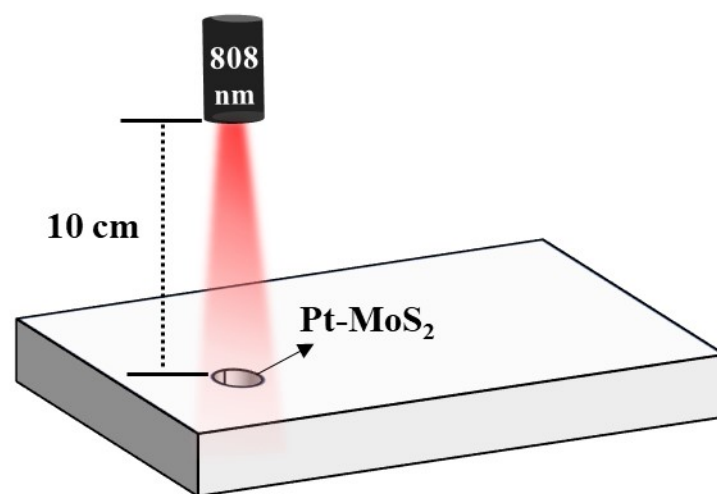

**Fig. S1.** Schematic illustration for the setup to test photothermal property.

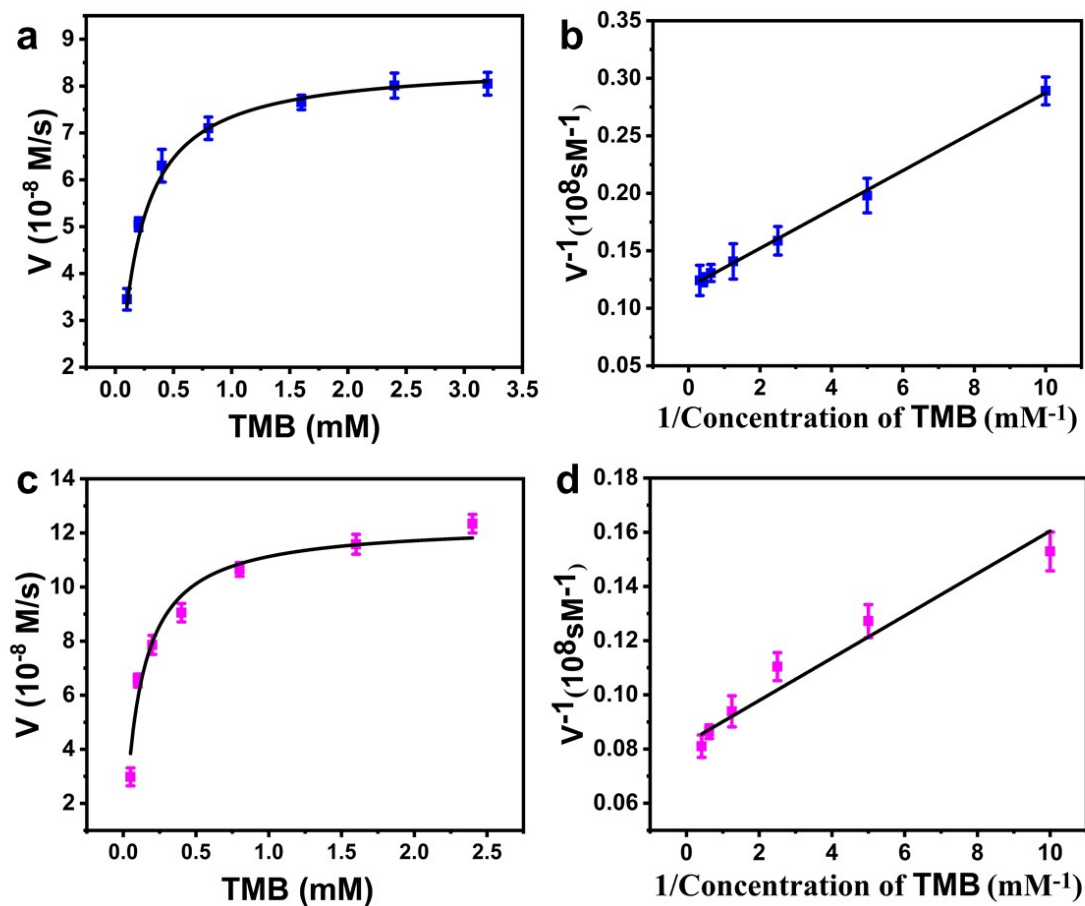

**Fig. S2.** Steady-state kinetic plots and Double-reciprocal plots of Pt-MoS<sub>2</sub> using TMB as substrate in the absence (a-b) and presence (c-d) of 808 nm NIR light irradiation ( $1\text{W}/\text{cm}^2$ , 5 min).

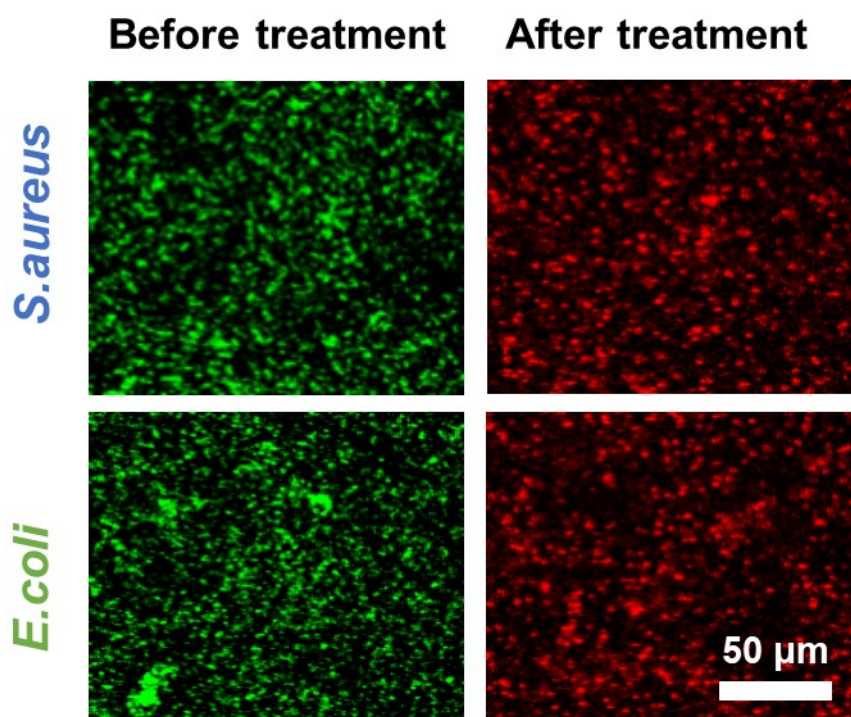

**Fig. S3.** The representative SYTO/PI live-dead staining fluorescent images of *S.aureus* and *E.coli* before and after treatment with  $H_2O_2$  + Pt-MoS<sub>2</sub> + NIR.
